# Supplementary material for: Differential Incidence of Tongue Base Cancer in Male and Female HPV16-Transgenic Mice: Role of Female Sex Hormone Receptors
Source: MDPI journal article supplement (doi:10.3390/pathogens10101224), 2021-09-22
Supplement: s1 [file s1]

**Supplementary Table 1.** Primer sequences and PCR conditions used for genotyping experimental mice.

| Gene       | Primer Sequence (5'→3')                                                     | Amplicon size (bp) |
|------------|-----------------------------------------------------------------------------|--------------------|
| <i>E7</i>  | F: GGAGGAGGATGAAATAGATGG<br>R: GCCCATTAAGAGGTCTTCCAA                        | 157                |
| <i>Hbb</i> | F: CCAATCTGCTCACACAGGATAGAGAGGGCAGG<br>R: CCTTGAGGCTGTCCAAGTGATTTCAGGCCATCG | 494                |

F - forward, R - reverse. Amplification conditions: DNA denaturation at 94°C for three minutes, 35 cycles at 94°C for 30 seconds, 60°C for 45 seconds, 72°C for 90 seconds and a final extension step at 72°C for ten minutes. Amplification of DNA fragments with the expected band size was confirmed by electrophoresis in a 3% agarose gel.

**Supplementary Table 2.** RT-PCR Primer sequences of for HPV16 E6, E7, E5, and for TBP, HPRT and  $\beta 2m$ . F - forward, R - reverse.

| Gene                         | Primer sequence (5'→3')                                      | Amplicon size (bp) |
|------------------------------|--------------------------------------------------------------|--------------------|
| <i>E6</i>                    | F: GAGCGACCCAGAAAGTTACCAC<br>R: ACCTCACGTCGCAGTAACTGTTG      | 107                |
| <i>E7</i>                    | F: ACCGGACAGAGCCCATTACAA<br>R: GTGCCCATTAAACAGGTCTTCC        | 120                |
| <i>E5</i>                    | F: CTTTGCTTTTGTGTGCTTTTGTGTG<br>R: AAAGCGTGCATGTGTATGTATTAAA | 192                |
| <i>TBP</i>                   | F: CAAACCCAGAATTGTTCTCCTT<br>R: ATGTGGTCTTCCTGAATCCCT        | 131                |
| <i>HPRT</i>                  | F: TGAAGAGCTACTGTAATGATCAGTCAAC<br>R: AGCAAGCTTGCAACCTTAACCA | 187                |
| <i><math>\beta 2m</math></i> | F: GGTCTTTCTGGTGCTTGTCTCA<br>R: GTTCGGCTTCCCATCTCTCC         | 103                |

F - forward, R - reverse.

**Supplementary Table 3.** Primary antibodies and dilutions used for immunohistochemical experiments.

| Target protein               | Supplier, clone           | Dilution |
|------------------------------|---------------------------|----------|
| <b>ER<math>\alpha</math></b> | Santa Cruz Biotech, F10   | 1:200    |
| <b>ER<math>\beta</math></b>  | Santa Cruz Biotech, B-1   | 1:200    |
| <b>PR</b>                    | Santa Cruz Biotech, AB-52 | 1:200    |
| <b>MMP2</b>                  | Santa Cruz Biotech, 8B4   | 1:100    |

ER $\alpha$ - Estrogen receptor alpha, ER $\beta$  - Estrogen receptor beta, PR- Progesterone receptor, MMP2- Matrix metalloproteinase 2.
